# Supplementary material for: Synthesis and supramolecular self-assembly of glutamic acid-based squaramides
Source: publisher site journal article supplement (doi:10.3762/bjoc.14.180), 2018-08-06
Supplement: Additional file 1 [file 1860-5397-14-180-S1.pdf]

**Supporting Information**

**for**

**Synthesis and supramolecular self-assembly of  
glutamic acid-based squaramides**

Juan V. Alegre-Requena,<sup>1</sup> Marleen Häring,<sup>2</sup> Isaac G. Sonsona,<sup>1</sup> Alex Abramov,<sup>2</sup>  
Eugenia Marqués-López,<sup>1</sup> Raquel P. Herrera\*<sup>1</sup> and David Díaz Díaz\*<sup>2,3</sup>

Address: <sup>1</sup>Laboratorio de Organocatálisis Asimétrica. Departamento de Química Orgánica Instituto de Síntesis Química y Catálisis Homogénea (ISQCH) CSIC-Universidad de Zaragoza C/ Pedro Cerbuna 12, 50009 Zaragoza, Spain.

<sup>2</sup>Institut für Organische Chemie, Universität Regensburg, Universitätsstr. 31, 93053 Regensburg, Germany and <sup>3</sup>Institute of Advanced Chemistry of Catalonia-Spanish National Research Council (IQAC-CSIC), Jordi Girona 18-26, 08034 Barcelona, Spain

Email: Raquel P. Herrera\* - raquelph@unizar.es; David Díaz Díaz\* - David.Diaz@chemie.uni-regensburg.de

\*Corresponding author

**NMR spectra, FTIR spectra, DSS plots, and additional  
photographs of gels in different solvents**

## List of contents

|                                                                                | <u>page</u> |
|--------------------------------------------------------------------------------|-------------|
| 1. $^1\text{H}$ NMR and $^{13}\text{C}$ NMR-APT spectra of new compounds ..... | S3          |
| 2. Photographs of gel materials .....                                          | S6          |
| 3. FTIR spectra .....                                                          | S7          |
| 4. DSS rheological measurements .....                                          | S8          |

# 1. NMR spectra of new compounds

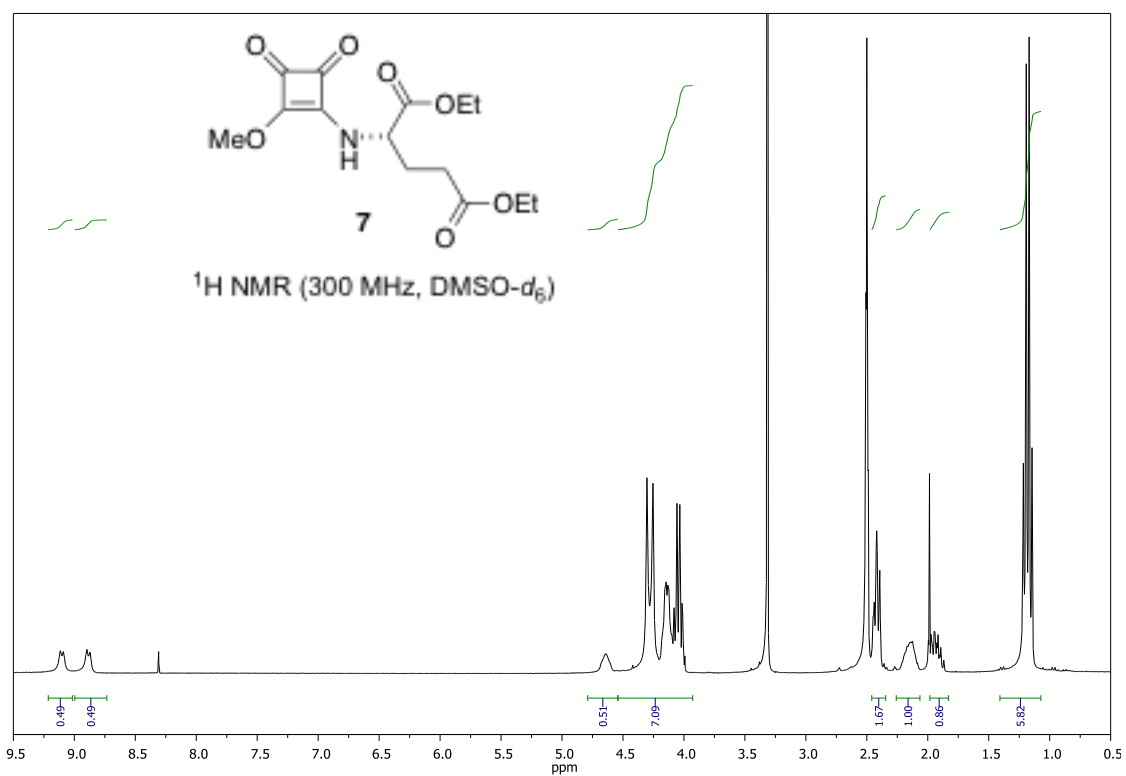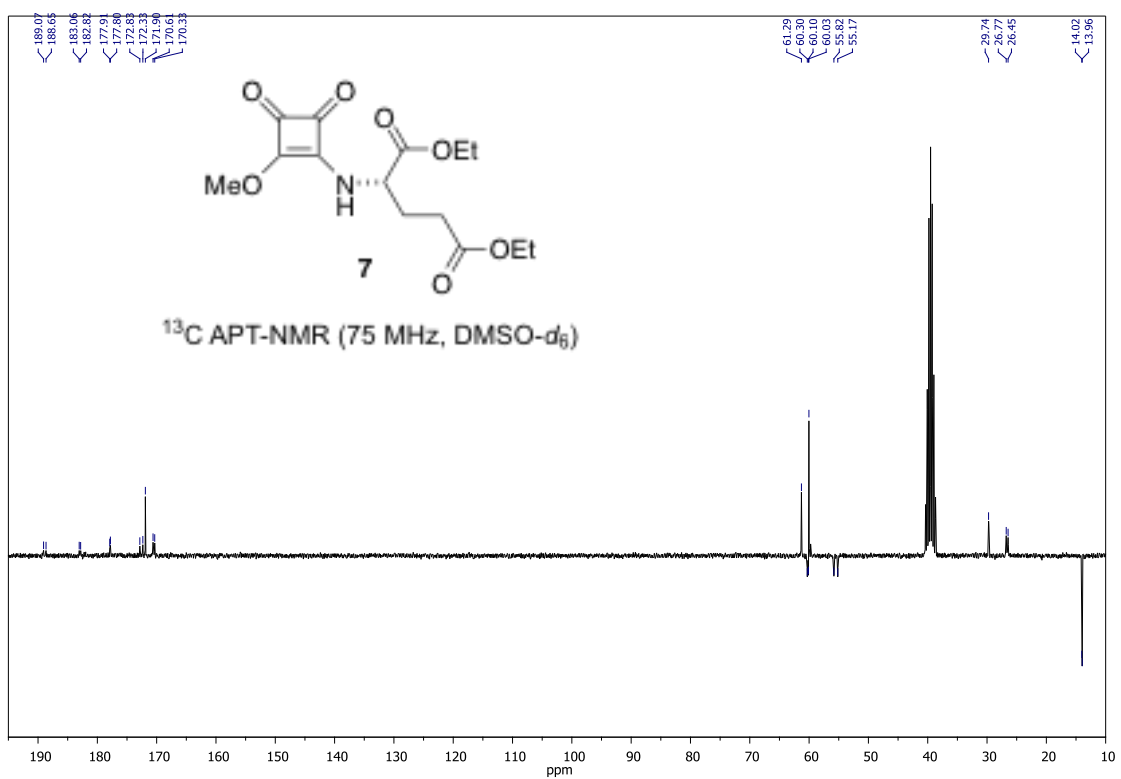

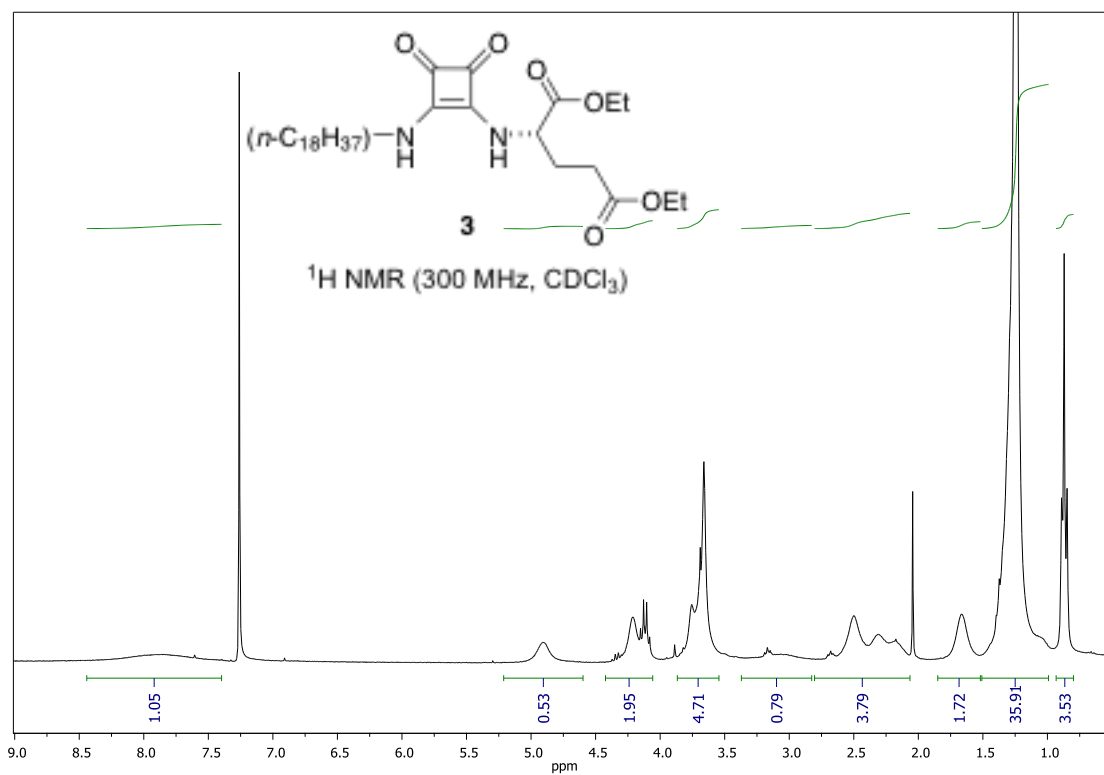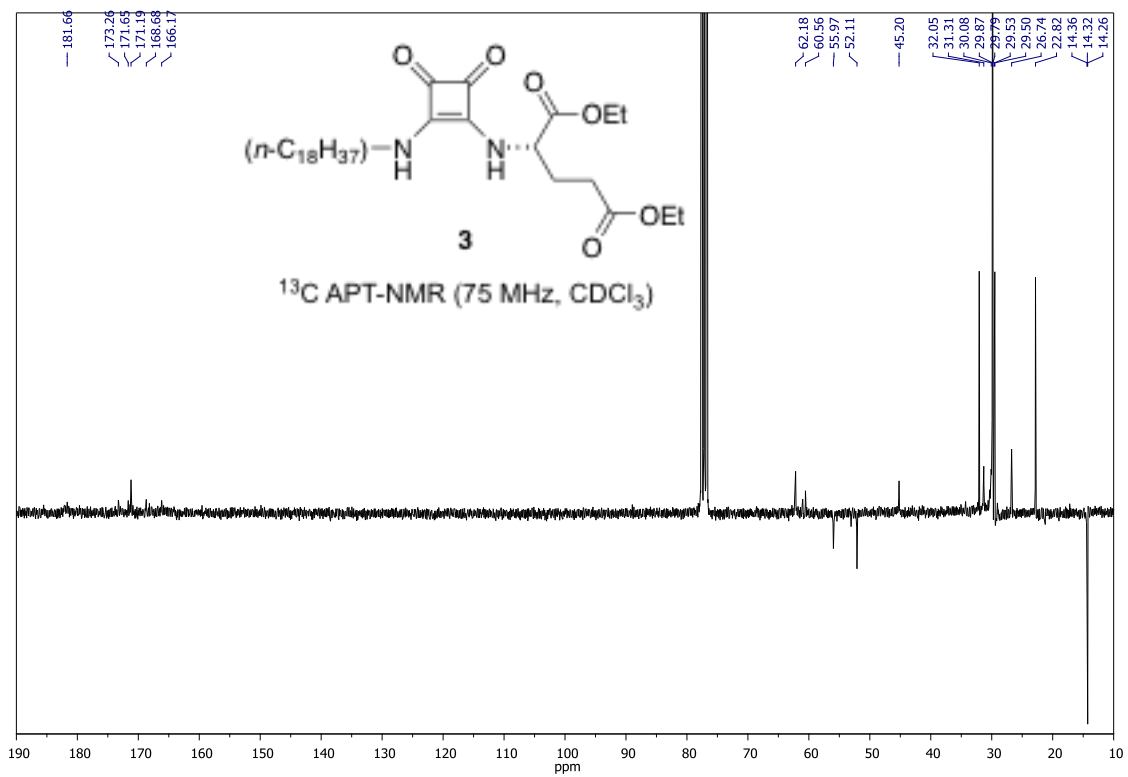

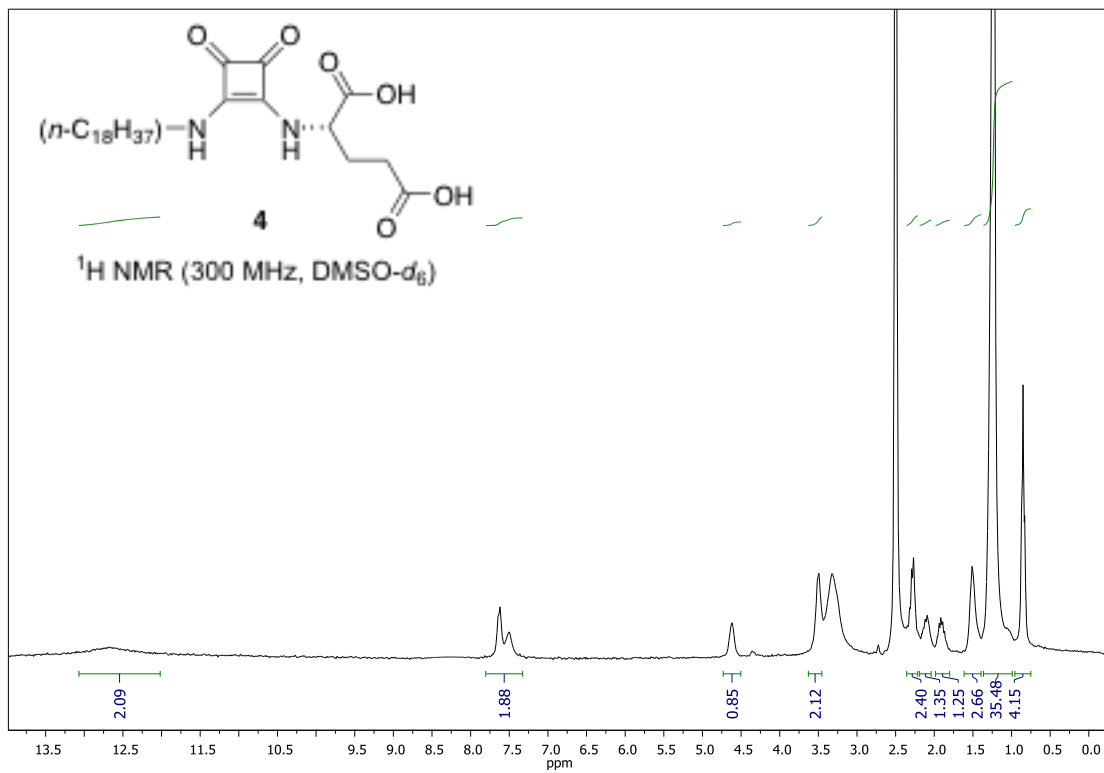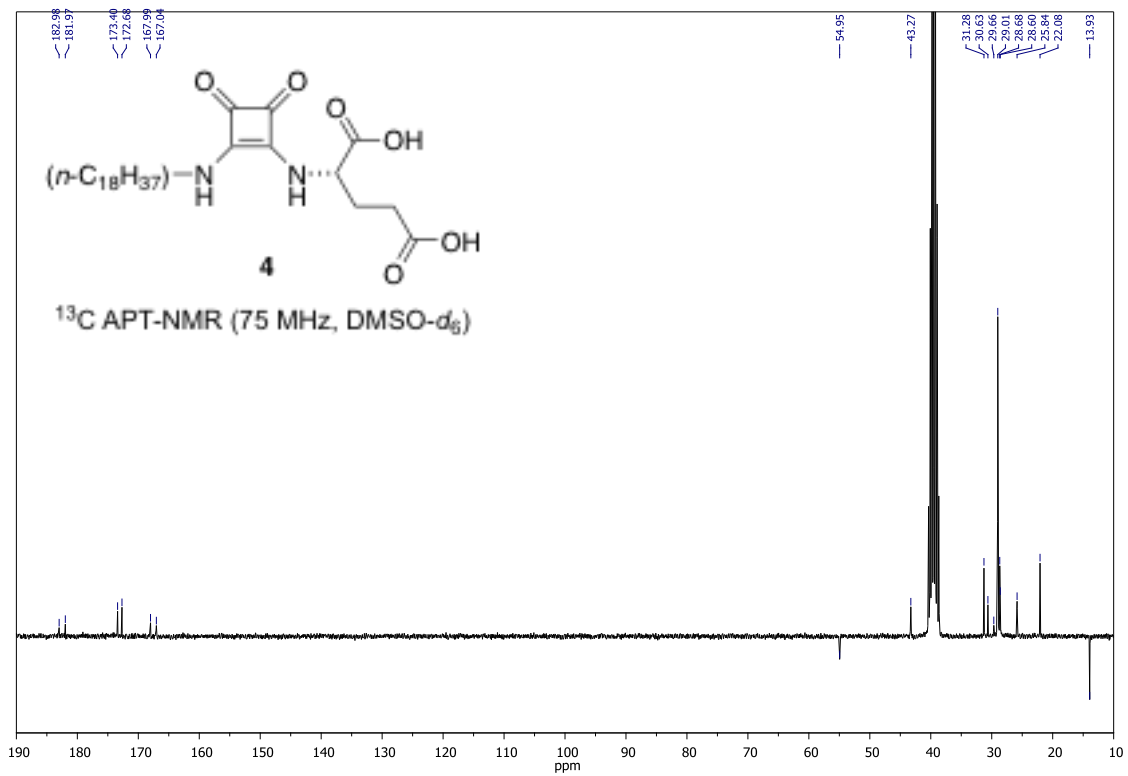

## 2. Photographs of gel materials

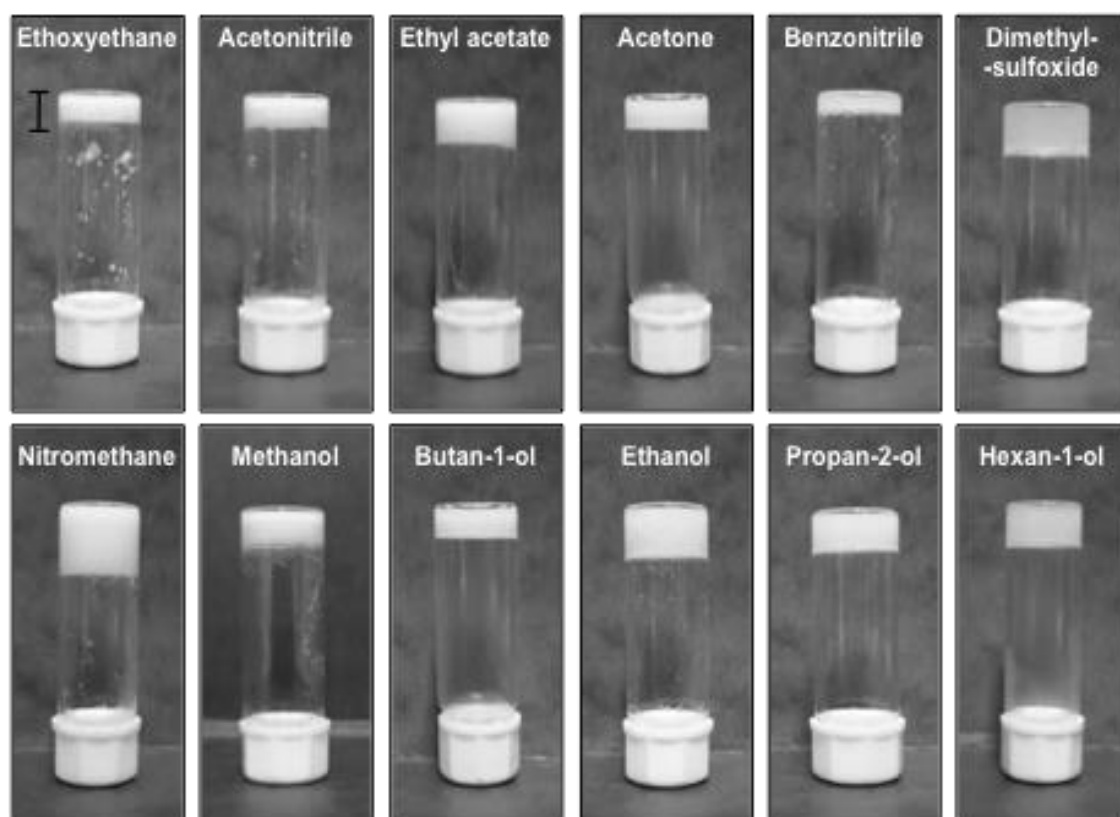

**Figure S1:** Selection of photographs showing upside-down vials containing gels made of **3** at their corresponding CGC (see Table 1) in different solvents. The scale bar included in the first photograph corresponds to 5 mm and it is the same for all photographs.

### 3. FTIR spectra

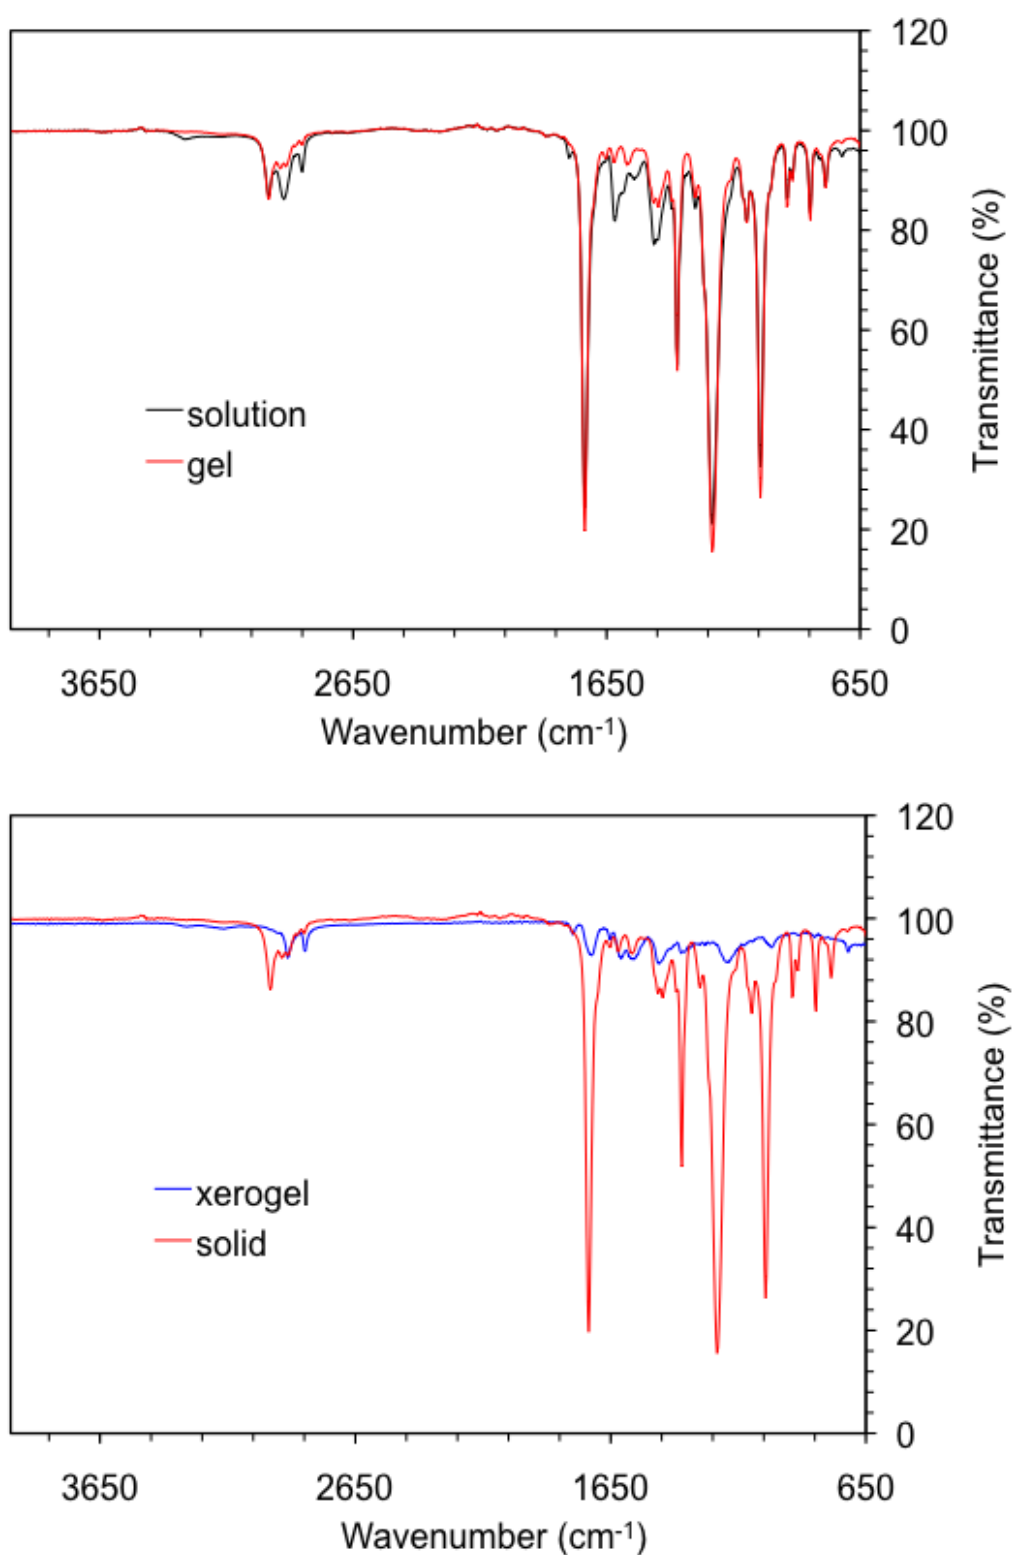

**Figure S2:** *Top:* FTIR spectra of the gel made of **3** in ethyl acetate ( $c = 36$  g/L) and corresponding solution upon heating. *Bottom:* FTIR spectra of solid **3** (as synthesized) and xerogel obtained by freeze-drying the corresponding organogel made in ethyl acetate ( $c = 36$  g/L).

#### 4. DSS rheological measurements

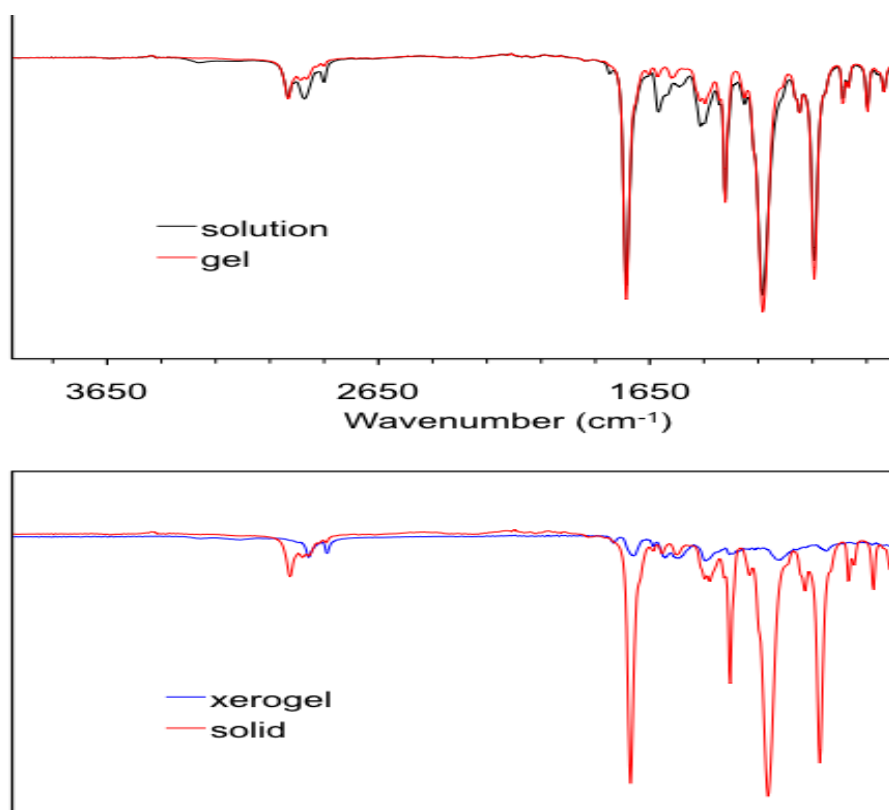

**Figure S3:** DSS measurements for model gels made of **3** in methanol ( $c = 47$  g/L) and ethyl acetate ( $c = 36$  g/L). The  $\tan \delta$  values for these gels were 0.2716 and 0.1790, respectively. Color, CGC,  $T_{\text{gel}}$  and gelation kinetics were similar from batch to batch experiments (error values are given in the main paper).
